# Supplementary material
Source: MDPI journal article supplement (https://www.mdpi.com/2227-9040/12/5/84)
Supplement: s1 [file s1 › chemosensors-2995259-supplementary.pdf]

*Supplementary Material*

# **Hydrothermally Synthesized Cerium Phosphate with Functionalized Carbon Nanofiber Nanocomposite for Enhanced Electrochemical Detection of Hypoxanthine**

**Prashant K. Kasare and Sea-Fue Wang \***

Department of Materials and Mineral Resources Engineering, National Taipei University of Technology,  
Taipei 106, Taiwan; t112a09402@ntut.edu.tw

\* Correspondence: sfwang@ntut.edu.tw

**Materials Characterizations:** Vesta software is utilized to analyze the crystal structure, with the Bruker AXS D8 advanced instrument X-ray diffractometer being used to identify the phase configuration using  $\text{CuK}\alpha$  radiation ( $\lambda = 1.5405\text{\AA}$ ). The microstructures were examined using an energy-dispersive X-ray spectroscope (7200-H, HORIBA) and a SEM apparatus (JSM-6510LV, JEOL) operating at 15 kV and 10  $\mu\text{A}$ . Electrochemical impedance spectroscopy (EIS) via Autolab (PGSTAT204) was used to investigate the electrochemical characteristics. The CHI 1211C electrocatalytic workstation can be used to perform electrochemical experiments in a traditional three-electrode cell, such as cyclic voltammetry (CV) and differential plus voltammetry (DPV). In this scenario, the working, reference, and counter electrodes were used as GCE (geometrical surface area = 0.071  $\text{cm}^2$ ), saturated Ag/AgCl, and Pt wire, respectively.

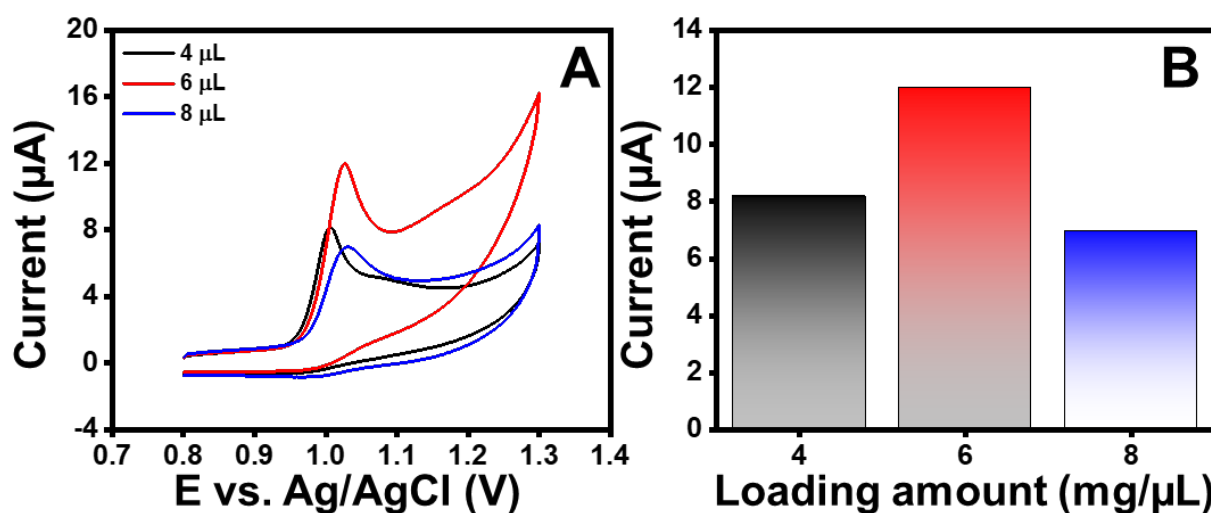

**Figure S1.** (A) CV curves for various loading amounts of  $\text{CePO}_4/\text{f-CNF}$  towards the detection of hypoxanthine in 0.1 M PB (pH-7.0). (B) Respective bar diagram for various loading amounts.

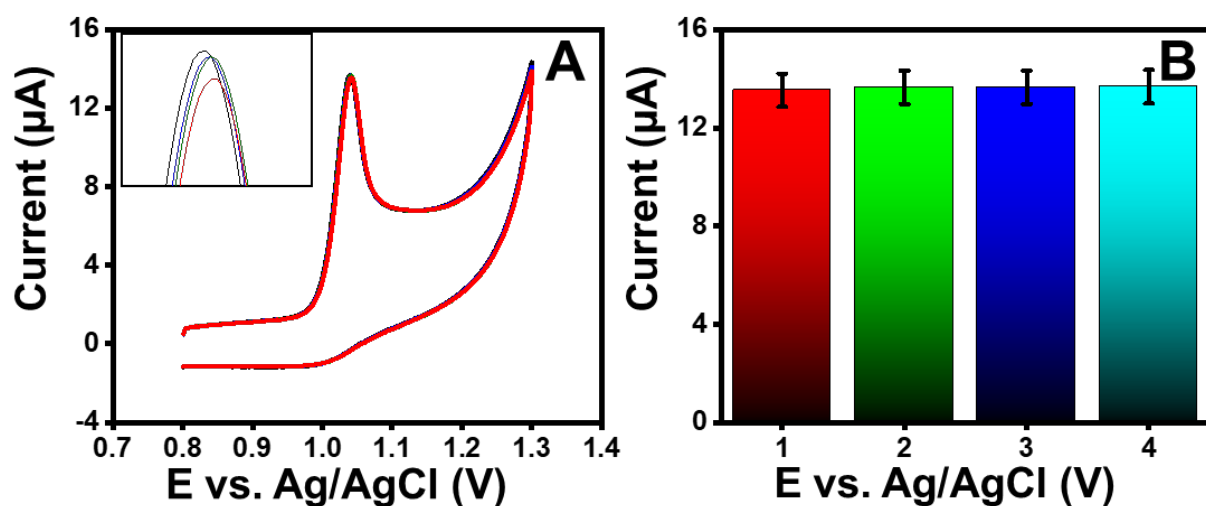

**Figure S2.** (A) and (B) CV curves for a repeatability study towards HXA in electrolyte PB (pH-7.0) and respective bar diagram.

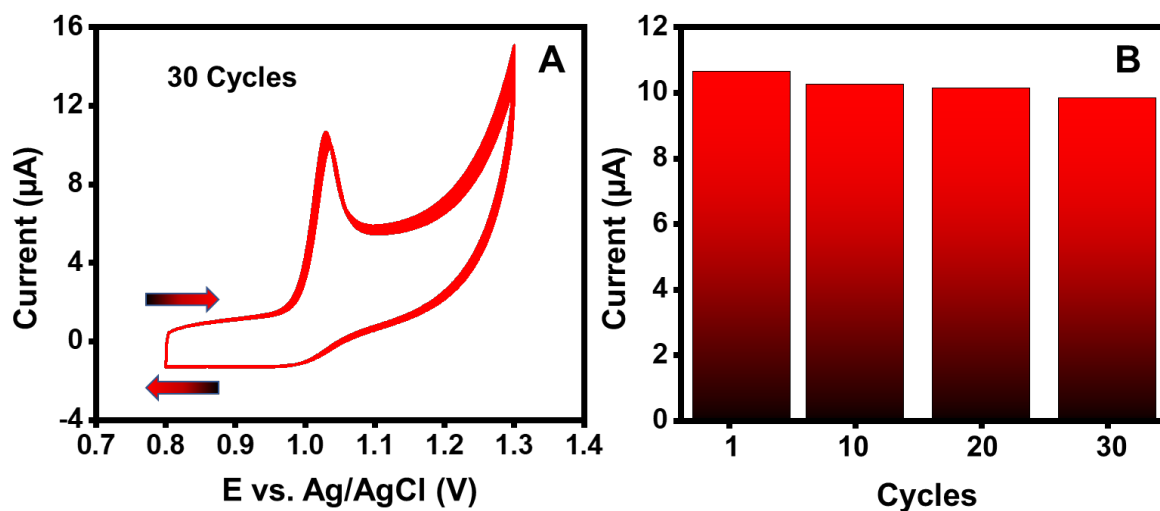

Figure S3. (A,B). Cycle stability of  $\text{CePO}_4/\text{f-CNF}$  with the presence of hypoxanthine, with a bar diagram.

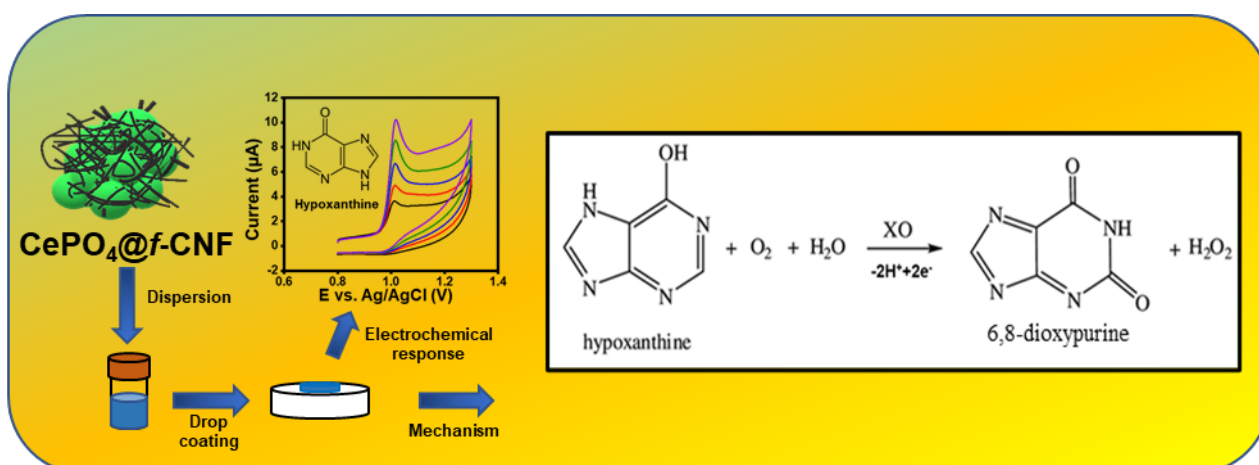

Figure S4. Possible electro-oxidation mechanism of hypoxanthine.

Table S1. Crystallographic analysis of  $\text{CePO}_4$  peak position ( $2\theta^\circ$ ) and lattice planes (hkl) value.

| Sr. No. | $2\theta^\circ$ | hkl | Sr. No | $2\theta^\circ$ | hkl |
|---------|-----------------|-----|--------|-----------------|-----|
| 1       | 21.3            | 111 | 10     | 46.2            | 212 |
| 2       | 25.2            | 111 | 11     | 48.6            | 132 |
| 3       | 27              | 200 | 12     | 50.8            | 023 |
| 4       | 28.9            | 120 | 13     | 51.9            | 322 |
| 5       | 31.2            | 012 | 14     | 52.6            | 132 |
| 6       | 34.5            | 202 | 15     | 54.2            | 140 |
| 7       | 36.8            | 112 | 16     | 60.4            | 014 |
| 8       | 41              | 130 | 17     | 70.2            | 124 |
| 9       | 42.1            | 103 | 18     | 77.2            | 513 |

Table S2. Summarized  $R_a$  values obtained from different modified electrodes.

| Electrode                             | Rct ( $\Omega\cdot\text{cm}^2$ ) |
|---------------------------------------|----------------------------------|
| <i>f</i> -CNF/GCE                     | 331.82                           |
| CePO <sub>4</sub> /GCE                | 767.87                           |
| CePO <sub>4</sub> @ <i>f</i> -CNF/GCE | 253.24                           |

**Table S3.** Comparison of the proposed method with other electrochemical methods for the determination of HX.

| Sensing materials                         | Method of detection | pH       | Linear range( $\mu\text{M}$ ) | LOD  | Ref.      |
|-------------------------------------------|---------------------|----------|-------------------------------|------|-----------|
| 4B-PGE                                    | DPV                 | 7.4 PBS  | 6–30                          | 1.09 | [1]       |
| Co-CeO <sub>2</sub> /GCE                  | DPV                 | 5.0 PBS  | 1–600                         | 0.36 | [2]       |
| Nf-(Ru(DMSO-Cl-H <sub>2</sub> O))-MME/GCE | DPV                 | 7.0 PBS  | 50–300                        | 2.37 | [3]       |
| MWCNT/GCE                                 | DPV                 | 7.14 PBS | 10–150                        | 2.87 | [4]       |
| GMC/GCE                                   | DPV                 | 7.0 PBS  | 20–240                        | 0.35 | [5]       |
| Poly(xylitol)/GCE                         | DPV                 | 5 PBS    | 5–55                          | 4.5  | [6]       |
| NSPE <sup>a</sup>                         | DPV                 | 7.5 PBS  | 4–30                          | 0.34 | [7]       |
| HDA/ERGO/GCE <sup>h</sup>                 | DPV                 | 7.2 PBS  | 5–300                         | 0.32 | [8]       |
| Nontronite/SPCE                           | SWV                 | 6.0 PBS  | 4–30                          | 0.42 | [7]       |
| CePO <sub>4</sub> @ <i>f</i> -CNF         | DPV                 | 7.0 PBS  | 2.05–629                      | 0.23 | This work |

## References

1. N. Vishnu, M. Gandhi, D. Rajagopal, and A. S. Kumar, "Pencil graphite as an elegant electrochemical sensor for separation-free and simultaneous sensing of hypoxanthine, xanthine and uric acid in fish samples," *Analytical Methods*, vol. 9, no. 15, pp. 2265–2274, **Apr. 2017**, doi: 10.1039/c7ay00445a.
2. N. Lavanya, C. Sekar, R. Murugan, and G. Ravi, "An ultrasensitive electrochemical sensor for simultaneous determination of xanthine, hypoxanthine and uric acid based on Co doped CeO<sub>2</sub> nanoparticles," *Materials Science and Engineering C*, vol. 65, pp. 278–286, **Aug. 2016**, doi: 10.1016/j.msec.2016.04.033.
3. A. S. Kumar and P. Swetha, "Ru(DMSO)4Cl<sub>2</sub> nano-aggregated Nafion membrane modified electrode for simultaneous electrochemical detection of hypoxanthine, xanthine and uric acid," *Journal of Electroanalytical Chemistry*, vol. 642, no. 2, pp. 135–142, **Apr. 2010**, doi: 10.1016/j.jelechem.2010.02.031.
4. A. S. Kumar and R. Shanmugam, "Simple method for simultaneous detection of uric acid, xanthine and hypoxanthine in fish samples using a glassy carbon electrode modified with as commercially received multiwalled carbon nanotubes," *Analytical Methods*, vol. 3, no. 9, pp. 2088–2094, **Sep. 2011**, doi: 10.1039/c1ay05065f.
5. R. Thangaraj and A. S. Kumar, "Graphitized mesoporous carbon modified glassy carbon electrode for selective sensing of xanthine, hypoxanthine and uric acid," *Analytical Methods*, vol. 4, no. 7, pp. 2162–2171, **Jul. 2012**, doi: 10.1039/c2ay25029b.
6. Z. Y. Dou, L. L. Cui, and X. Q. He, "Electrochemical determination of uric acid, xanthine and hypoxanthine by poly(xylitol) modified glassy carbon electrode," *J Cent South Univ*, vol. 21, no. 3, pp. 870–876, **2014**, doi: 10.1007/s11771-014-2012-6.
7. J.-M. Zen, Y.-Y. Lai, H.-H. Yang, and A. S. Kumar, "Multianalyte sensor for the simultaneous determination of hypoxanthine, xanthine and uric acid based on a preanodized nontronite-coated screen-printed electrode."
8. M. A. Raj and S. A. John, "Simultaneous determination of uric acid, xanthine, hypoxanthine and caffeine in human blood serum and urine samples using electrochemically reduced graphene oxide modified electrode," *Anal Chim Acta*, vol. 771, pp. 14–20, **Apr. 2013**, doi: 10.1016/j.aca.2013.02.017.
